# Supplementary material for: Aluminates with Fluorinated Schiff Bases: Influence of the Alkali Metal–Fluorine Interactions in Structure Stabilization
Source: MDPI journal article supplement (doi:10.3390/molecules23123108), 2018-11-27
Supplement: s1 [file s1]

# Supporting Information for

## *Aluminates with Fluorinated Schiff Bases: Influence of the Alkali Metal–Fluorine Interaction in Structure Stabilization*

Francisco M. García-Valle, Vanessa Tabernero, Tomás Cuenca, Jesús Cano,\* and Marta E. G. Mosquera\*<sup>a</sup>

<sup>a</sup> *Departamento de Química Orgánica y Química Inorgánica, Instituto de Investigación en Química “Andrés M. del Río” (IQAR), Universidad de Alcalá, Campus Universitario, 28871-Alcalá de Henares, Spain*

1. <sup>1</sup>H NMR spectrum for the reaction performed with a 2:1:1 ratio
2. <sup>1</sup>H NMR spectrum for the reaction with a 1:1:1 ratio ([HL]/[M]/[Al]) monitored in a NMR tube
3. <sup>1</sup>H NMR spectrum of [NaLa] and AlMe<sub>3</sub> reaction in a 1:2 molar ratio
4. Single-Crystal X-ray Structure Determination of (1·2C<sub>6</sub>H<sub>6</sub>) and 2.

## 1. $^1\text{H}$ NMR spectrum for the reaction performed with a 2:1:1 ratio

- Complex  $[\text{NaAlMe}_2(\text{La})_2]$ , (**3**)

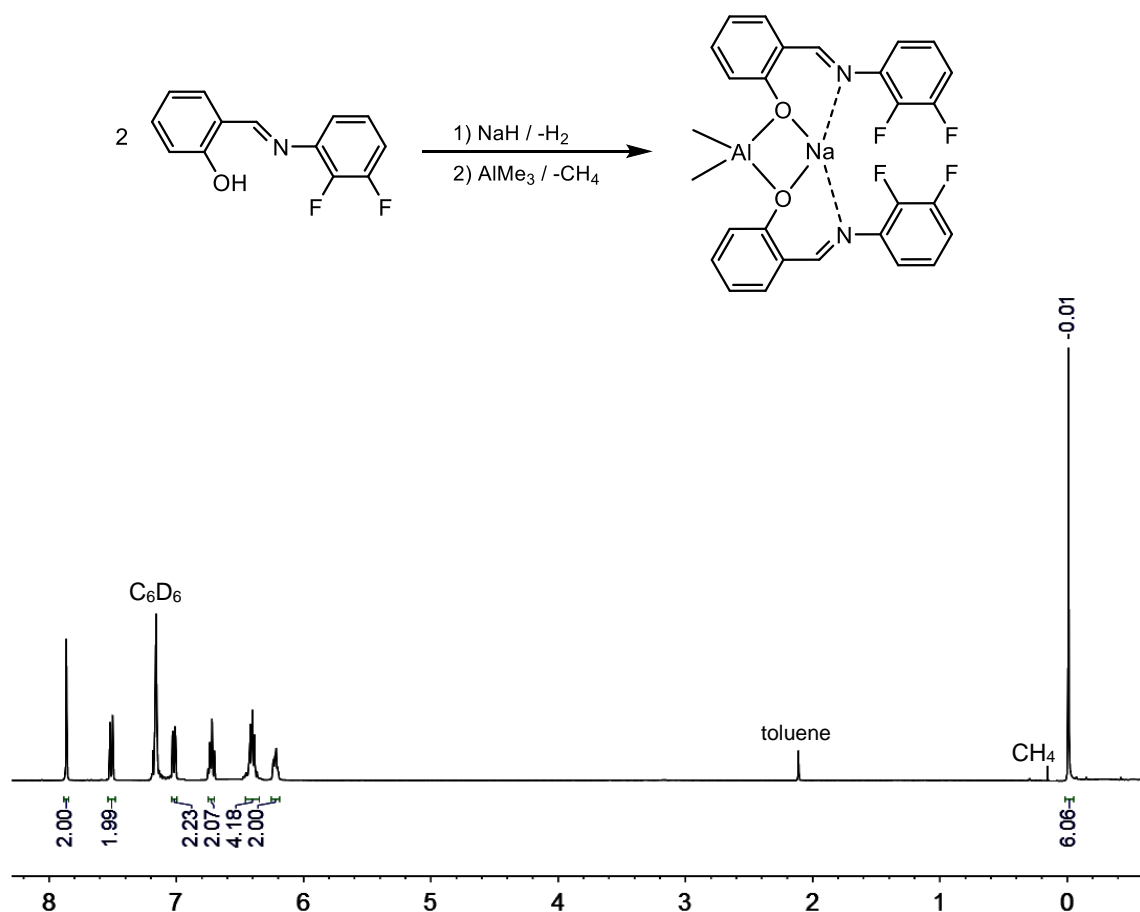

**Figure S1**  $^1\text{H}$  NMR spectrum of complex **3** obtained in the stoichiometric reaction, and recorded in  $\text{C}_6\text{D}_6$  at room temperature.

**2.  $^1\text{H}$  NMR spectrum for the reaction with a 1:1:1 ratio ( $[\text{HL}]/[\text{M}]/[\text{Al}]$ ) monitored in a NMR tube**

- Complex  $[\text{NaAlMe}_2(\text{La})_2]$ , (**3**)

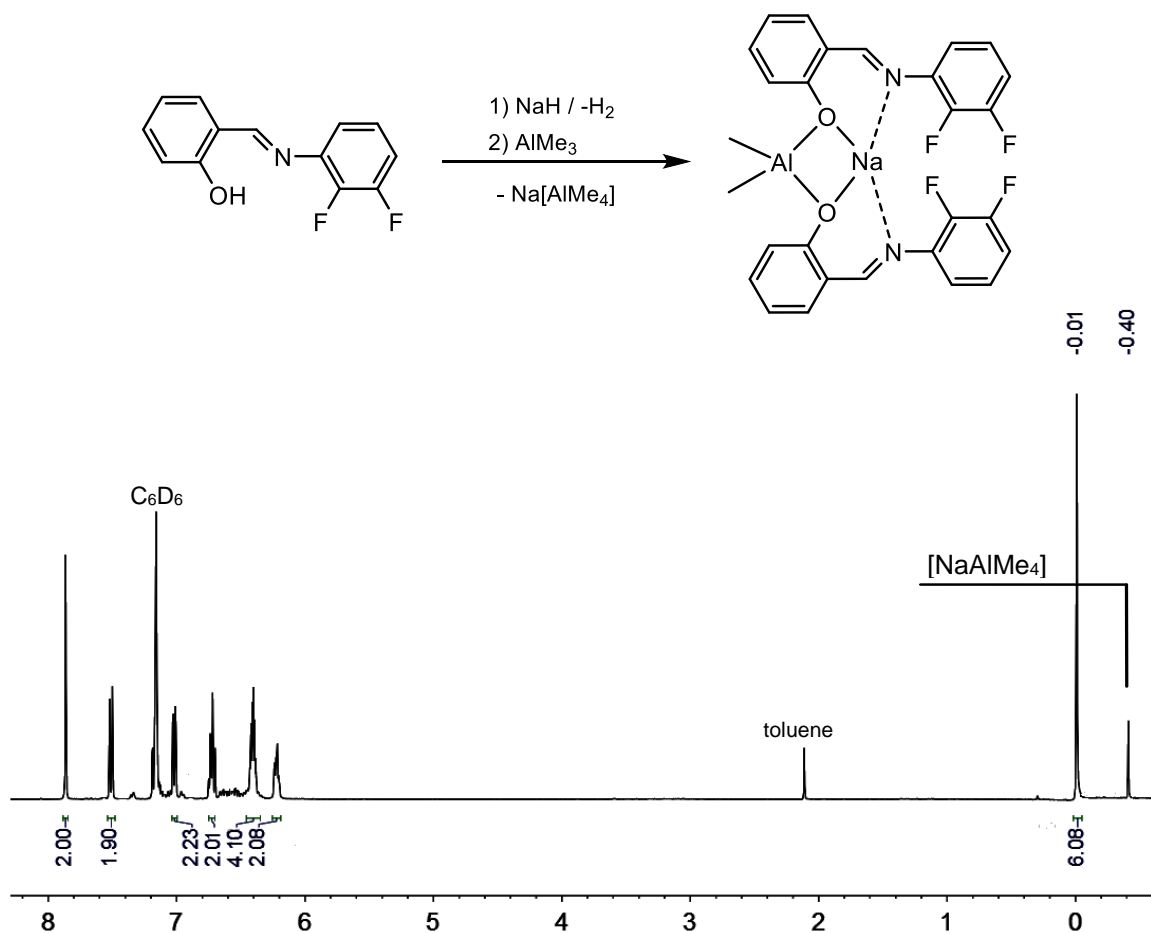

**Figure S2**  $^1\text{H}$  NMR spectrum of the stoichiometric reaction in a NMR tube with a 1:1:1 ratio ( $[\text{HL}]/[\text{M}]/[\text{Al}]$ ), and recorded in  $\text{C}_6\text{D}_6$  at room temperature.

### 3. $^1\text{H}$ NMR Spectra of $[\text{NaL}]$ and $\text{AlMe}_3$ reaction in a 1:2 molar ratio

- Reaction:  $[\text{NaLa}] + 2 \text{AlMe}_3$

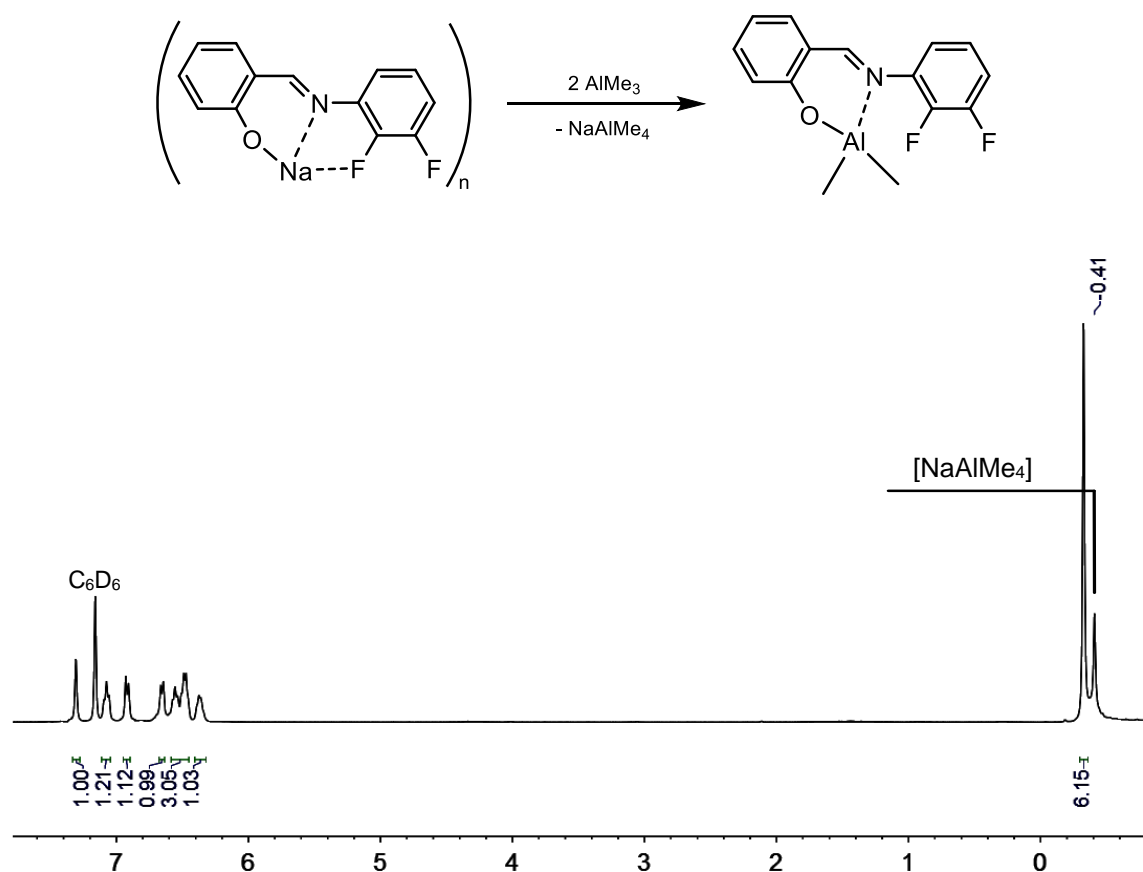

**Figure S3**  $^1\text{H}$  NMR spectrum of complex  $[\text{AlMe}_2(\text{La})]$  recorded in  $\text{C}_6\text{D}_6$  at room temperature

#### 4. Single-Crystal X-ray Structure Determination of (1·2C<sub>6</sub>D<sub>6</sub>) and 2

**Table S1** Bond lengths (Å) and angles (°) for [LiAlMe<sub>3</sub>La]·2(C<sub>6</sub>D<sub>6</sub>), (1·2C<sub>6</sub>D<sub>6</sub>)

| Bond lengths (Å)     |           |                   |           |
|----------------------|-----------|-------------------|-----------|
| Li(1)-O(1)           | 1.982(8)  | Al(1)-C(2)        | 1.953(5)  |
| Li(1)-O(1)#1         | 1.998(8)  | Al(1)-C(1)        | 1.994(5)  |
| Li(1)-N(1)           | 2.007(9)  | C(4)-C(9)         | 1.397(6)  |
| Li(1)-F(1)           | 2.299(8)  | C(4)-C(5)         | 1.397(6)  |
| Li(1)-Li(1)#1        | 2.629(15) | C(5)-C(6)         | 1.352(7)  |
| Li(1)-Al(1)          | 2.824(8)  | C(6)-C(7)         | 1.380(8)  |
| Li(1)-C(1)           | 2.413(4)  | C(7)-C(8)         | 1.392(7)  |
| N(1)-C(10)           | 1.280(6)  | C(8)-C(9)         | 1.390(7)  |
| N(1)-C(11)           | 1.434(6)  | C(9)-C(10)        | 1.460(7)  |
| O(1)-C(4)            | 1.363(5)  | C(11)-C(16)       | 1.366(7)  |
| O(1)-Al(1)           | 1.902(3)  | C(11)-C(12)       | 1.392(7)  |
| O(1)-Li(1)#1         | 1.998(8)  | C(12)-C(13)       | 1.406(7)  |
| F(1)-C(16)           | 1.359(5)  | C(13)-C(14)       | 1.366(8)  |
| F(2)-C(15)           | 1.336(6)  | C(14)-C(15)       | 1.368(8)  |
| Al(1)-C(3)           | 1.954(5)  | C(15)-C(16)       | 1.381(7)  |
| Angles (°)           |           |                   |           |
| O(1)-Li(1)-O(1)#1    | 97.6(3)   | C(3)-Al(1)-C(1)   | 109.8(2)  |
| O(1)-Li(1)-N(1)      | 92.3(3)   | C(2)-Al(1)-C(1)   | 113.4(2)  |
| O(1)#1-Li(1)-N(1)    | 121.3(4)  | O(1)-Al(1)-Li(1)  | 44.31(17) |
| O(1)-Li(1)-F(1)      | 154.7(4)  | C(3)-Al(1)-Li(1)  | 134.1(2)  |
| O(1)#1-Li(1)-F(1)    | 107.7(3)  | C(2)-Al(1)-Li(1)  | 108.9(2)  |
| N(1)-Li(1)-F(1)      | 76.0(3)   | C(1)-Al(1)-Li(1)  | 57.0(2)   |
| O(1)-Li(1)-Li(1)#1   | 49.1(2)   | O(1)-C(4)-C(9)    | 123.4(4)  |
| O(1)#1-Li(1)-Li(1)#1 | 48.5(3)   | O(1)-C(4)-C(5)    | 118.7(4)  |
| N(1)-Li(1)-Li(1)#1   | 115.2(5)  | C(9)-C(4)-C(5)    | 117.9(4)  |
| F(1)-Li(1)-Li(1)#1   | 156.2(5)  | C(6)-C(5)-C(4)    | 121.1(4)  |
| O(1)-Li(1)-Al(1)     | 42.17(17) | C(5)-C(6)-C(7)    | 121.9(4)  |
| O(1)#1-Li(1)-Al(1)   | 114.7(3)  | C(6)-C(7)-C(8)    | 117.6(4)  |
| N(1)-Li(1)-Al(1)     | 110.9(3)  | C(7)-C(8)-C(9)    | 121.4(4)  |
| F(1)-Li(1)-Al(1)     | 121.2(3)  | C(4)-C(9)-C(8)    | 120.1(4)  |
| Li(1)#1-Li(1)-Al(1)  | 76.1(3)   | C(4)-C(9)-C(10)   | 125.1(4)  |
| C(10)-N(1)-C(11)     | 118.4(4)  | C(8)-C(9)-C(10)   | 114.9(4)  |
| C(10)-N(1)-Li(1)     | 125.6(4)  | N(1)-C(10)-C(9)   | 126.3(4)  |
| C(11)-N(1)-Li(1)     | 116.1(3)  | C(16)-C(11)-C(12) | 118.6(4)  |
| C(4)-O(1)-Al(1)      | 116.6(2)  | C(16)-C(11)-N(1)  | 116.3(4)  |
| C(4)-O(1)-Li(1)      | 126.9(3)  | C(12)-C(11)-N(1)  | 125.1(4)  |
| Al(1)-O(1)-Li(1)     | 93.5(3)   | C(11)-C(12)-C(13) | 119.1(5)  |
| C(4)-O(1)-Li(1)#1    | 113.6(3)  | C(14)-C(13)-C(12) | 121.0(5)  |
| Al(1)-O(1)-Li(1)#1   | 119.0(3)  | C(15)-C(14)-C(13) | 118.7(5)  |
| Li(1)-O(1)-Li(1)#1   | 82.4(3)   | F(2)-C(15)-C(14)  | 121.0(4)  |

|                  |            |                   |          |
|------------------|------------|-------------------|----------|
| C(16)-F(1)-Li(1) | 107.7(3)   | F(2)-C(15)-C(16)  | 118.6(4) |
| O(1)-Al(1)-C(3)  | 111.33(19) | C(14)-C(15)-C(16) | 120.4(5) |
| O(1)-Al(1)-C(2)  | 105.49(19) | F(1)-C(16)-C(11)  | 119.4(4) |
| C(3)-Al(1)-C(2)  | 116.0(2)   | F(1)-C(16)-C(15)  | 118.4(4) |
| O(1)-Al(1)-C(1)  | 99.43(17)  | C(11)-C(16)-C(15) | 122.2(4) |

**Table S2** Bond lengths (Å) and angles (°) for [NaAlMe<sub>3</sub>La], (2)

| Bond lengths (Å)    |            |                     |            |
|---------------------|------------|---------------------|------------|
| Na(1)-O(1)          | 2.3254(18) | O(1)-Na(1)#1        | 2.3658(19) |
| Na(1)-O(1)#1        | 2.3657(19) | F(1)-C(16)          | 1.357(3)   |
| Na(1)-N(1)          | 2.389(2)   | F(2)-C(15)          | 1.347(3)   |
| Na(1)-F(1)          | 2.4608(18) | C(4)-C(5)           | 1.395(3)   |
| Na(1)-C(3)          | 2.737(6)   | C(4)-C(9)           | 1.405(4)   |
| Na(1)-C(4)#1        | 2.970(3)   | C(4)-Na(1)#1        | 2.970(3)   |
| Na(1)-C(5)#1        | 3.066(3)   | C(5)-C(6)           | 1.385(4)   |
| Na(1)-Al(1)         | 3.1940(13) | C(5)-Na(1)#1        | 3.066(3)   |
| Na(1)-Na(1)#1       | 3.334(2)   | C(6)-C(7)           | 1.375(4)   |
| Na(1)-Al(1)#1       | 3.5005(14) | C(7)-C(8)           | 1.378(4)   |
| Al(1)-O(1)          | 1.8621(19) | C(8)-C(9)           | 1.394(3)   |
| Al(1)-C(2)          | 1.965(3)   | C(9)-C(10)          | 1.468(4)   |
| Al(1)-C(1)          | 1.977(4)   | C(11)-C(16)         | 1.380(4)   |
| Al(1)-C(3)          | 1.981(4)   | C(11)-C(12)         | 1.394(4)   |
| Al(1)-Na(1)#1       | 3.5004(14) | C(12)-C(13)         | 1.378(4)   |
| N(1)-C(10)          | 1.275(3)   | C(13)-C(14)         | 1.374(4)   |
| N(1)-C(11)          | 1.416(3)   | C(14)-C(15)         | 1.369(4)   |
| O(1)-C(4)           | 1.349(3)   | C(15)-C(16)         | 1.369(4)   |
| Angles (°)          |            |                     |            |
| O(1)-Na(1)-O(1)#1   | 89.41(6)   | C(1)-Al(1)-C(3)     | 110.7(2)   |
| O(1)-Na(1)-N(1)     | 76.05(7)   | O(1)-Al(1)-Na(1)    | 46.01(6)   |
| O(1)#1-Na(1)-N(1)   | 146.60(9)  | C(2)-Al(1)-Na(1)    | 108.80(10) |
| O(1)-Na(1)-F(1)     | 142.63(7)  | C(1)-Al(1)-Na(1)    | 134.23(15) |
| O(1)#1-Na(1)-F(1)   | 125.64(7)  | C(3)-Al(1)-Na(1)    | 58.39(16)  |
| N(1)-Na(1)-F(1)     | 67.32(6)   | O(1)-Al(1)-Na(1)#1  | 39.05(5)   |
| O(1)-Na(1)-C(3)     | 71.27(11)  | C(2)-Al(1)-Na(1)#1  | 143.81(10) |
| O(1)#1-Na(1)-C(3)   | 95.30(11)  | C(1)-Al(1)-Na(1)#1  | 76.81(13)  |
| N(1)-Na(1)-C(3)     | 107.75(10) | C(3)-Al(1)-Na(1)#1  | 88.10(12)  |
| F(1)-Na(1)-C(3)     | 112.62(13) | Na(1)-Al(1)-Na(1)#1 | 59.53(3)   |
| O(1)-Na(1)-C(4)#1   | 105.01(7)  | C(10)-N(1)-C(11)    | 117.3(2)   |
| O(1)#1-Na(1)-C(4)#1 | 26.31(6)   | C(10)-N(1)-Na(1)    | 123.94(18) |
| N(1)-Na(1)-C(4)#1   | 171.28(9)  | C(11)-N(1)-Na(1)    | 116.96(16) |
| F(1)-Na(1)-C(4)#1   | 112.32(7)  | C(4)-O(1)-Al(1)     | 122.80(15) |
| C(3)-Na(1)-C(4)#1   | 80.60(10)  | C(4)-O(1)-Na(1)     | 126.01(15) |
| O(1)-Na(1)-C(5)#1   | 130.48(7)  | Al(1)-O(1)-Na(1)    | 98.81(8)   |
| O(1)#1-Na(1)-C(5)#1 | 49.56(6)   | C(4)-O(1)-Na(1)#1   | 102.68(14) |

|                       |            |                    |            |
|-----------------------|------------|--------------------|------------|
| N(1)-Na(1)-C(5)#1     | 153.47(8)  | Al(1)-O(1)-Na(1)#1 | 111.22(8)  |
| F(1)-Na(1)-C(5)#1     | 86.34(7)   | Na(1)-O(1)-Na(1)#1 | 90.59(6)   |
| C(3)-Na(1)-C(5)#1     | 84.68(10)  | C(16)-F(1)-Na(1)   | 115.88(14) |
| C(4)#1-Na(1)-C(5)#1   | 26.67(7)   | Al(1)-C(3)-Na(1)   | 83.56(16)  |
| O(1)-Na(1)-Al(1)      | 35.18(5)   | O(1)-C(4)-C(5)     | 118.9(2)   |
| O(1)#1-Na(1)-Al(1)    | 101.74(5)  | O(1)-C(4)-C(9)     | 122.5(2)   |
| N(1)-Na(1)-Al(1)      | 83.59(6)   | C(5)-C(4)-C(9)     | 118.5(2)   |
| F(1)-Na(1)-Al(1)      | 129.25(6)  | O(1)-C(4)-Na(1)#1  | 51.01(11)  |
| C(3)-Na(1)-Al(1)      | 38.05(9)   | C(5)-C(4)-Na(1)#1  | 80.51(15)  |
| C(4)#1-Na(1)-Al(1)    | 102.31(6)  | C(9)-C(4)-Na(1)#1  | 140.81(16) |
| C(5)#1-Na(1)-Al(1)    | 117.56(7)  | C(6)-C(5)-C(4)     | 121.2(3)   |
| O(1)-Na(1)-Na(1)#1    | 45.19(5)   | C(6)-C(5)-Na(1)#1  | 141.05(19) |
| O(1)#1-Na(1)-Na(1)#1  | 44.22(4)   | C(4)-C(5)-Na(1)#1  | 72.82(14)  |
| N(1)-Na(1)-Na(1)#1    | 115.10(7)  | C(7)-C(6)-C(5)     | 120.2(3)   |
| F(1)-Na(1)-Na(1)#1    | 165.40(8)  | C(6)-C(7)-C(8)     | 119.2(3)   |
| C(3)-Na(1)-Na(1)#1    | 80.89(12)  | C(7)-C(8)-C(9)     | 122.0(3)   |
| C(4)#1-Na(1)-Na(1)#1  | 62.91(6)   | C(8)-C(9)-C(4)     | 118.8(2)   |
| C(5)#1-Na(1)-Na(1)#1  | 89.57(6)   | C(8)-C(9)-C(10)    | 115.8(2)   |
| Al(1)-Na(1)-Na(1)#1   | 64.81(4)   | C(4)-C(9)-C(10)    | 125.4(2)   |
| O(1)-Na(1)-Al(1)#1    | 94.28(6)   | N(1)-C(10)-C(9)    | 127.0(2)   |
| O(1)#1-Na(1)-Al(1)#1  | 29.73(5)   | C(16)-C(11)-C(12)  | 117.0(2)   |
| N(1)-Na(1)-Al(1)#1    | 120.39(7)  | C(16)-C(11)-N(1)   | 117.6(2)   |
| F(1)-Na(1)-Al(1)#1    | 110.15(6)  | C(12)-C(11)-N(1)   | 125.2(2)   |
| C(3)-Na(1)-Al(1)#1    | 124.59(11) | C(13)-C(12)-C(11)  | 120.5(3)   |
| C(4)#1-Na(1)-Al(1)#1  | 51.08(5)   | C(14)-C(13)-C(12)  | 121.5(3)   |
| C(5)#1-Na(1)-Al(1)#1  | 64.58(6)   | C(15)-C(14)-C(13)  | 118.0(3)   |
| Al(1)-Na(1)-Al(1)#1   | 120.47(3)  | F(2)-C(15)-C(16)   | 118.6(3)   |
| Na(1)#1-Na(1)-Al(1)#1 | 55.66(3)   | F(2)-C(15)-C(14)   | 120.3(3)   |
| O(1)-Al(1)-C(2)       | 106.64(11) | C(16)-C(15)-C(14)  | 121.0(3)   |
| O(1)-Al(1)-C(1)       | 106.14(14) | F(1)-C(16)-C(15)   | 119.5(2)   |
| C(2)-Al(1)-C(1)       | 114.77(18) | F(1)-C(16)-C(11)   | 118.6(2)   |
| O(1)-Al(1)-C(3)       | 101.10(15) | C(15)-C(16)-C(11)  | 121.9(3)   |
| C(2)-Al(1)-C(3)       | 115.92(17) |                    |            |

---
